# Supplementary material for: The ability to survive intracellular freezing in nematodes is related to the pattern and distribution of ice formed
Source: Oxford University Press journal article supplement (doi:10.1242/jeb.137190), 2016-01-01
Supplement: jeb137190supp.pdf [file jeb137190supp.pdf]

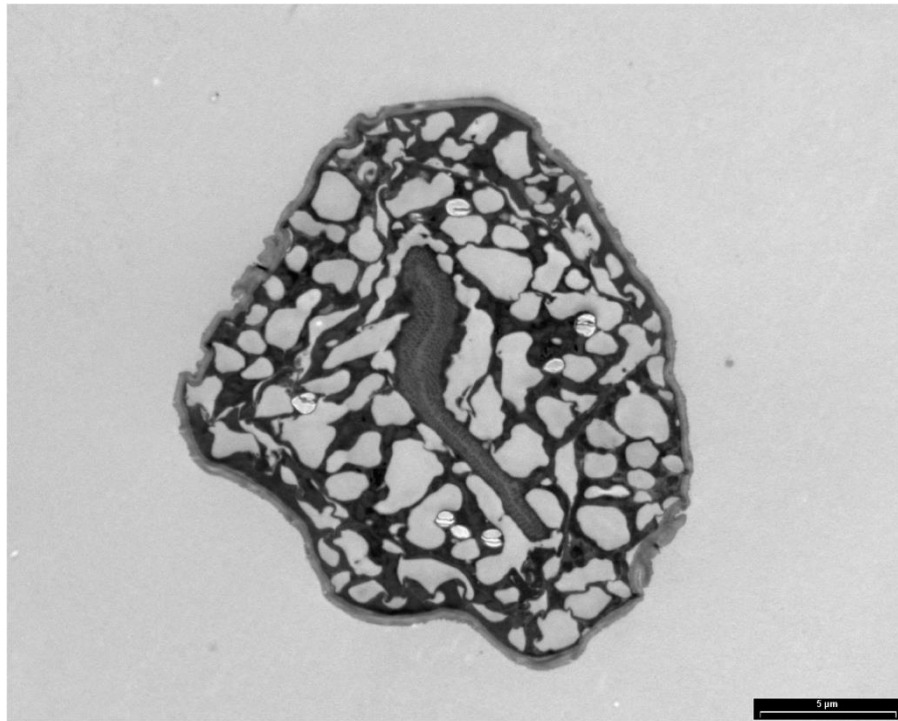

Fig. S1. Enlarged version of Fig. 3c, for legend and labels see Fig. 3.

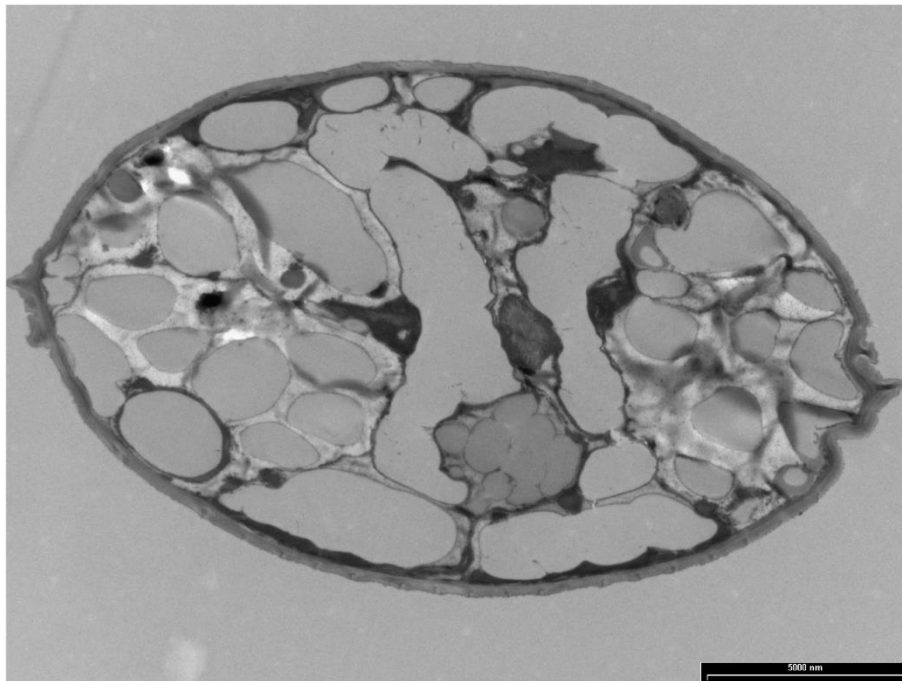

Fig. S2. Enlarged version of Fig. 3d, for legend and labels see Fig. 3.

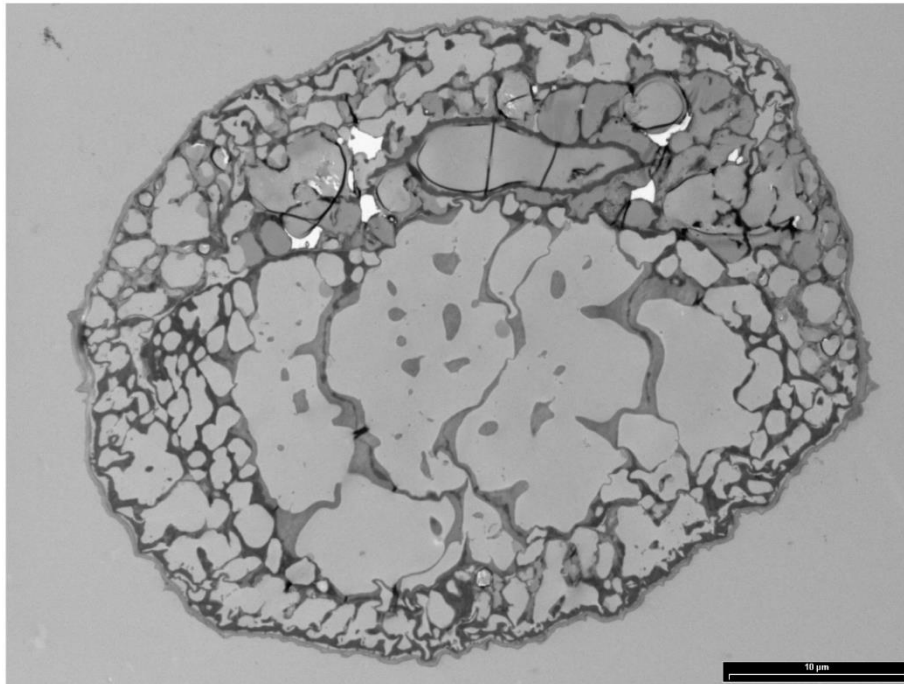

Fig. S3. Enlarged version of Fig. 3e, for legend and labels see Fig. 3.

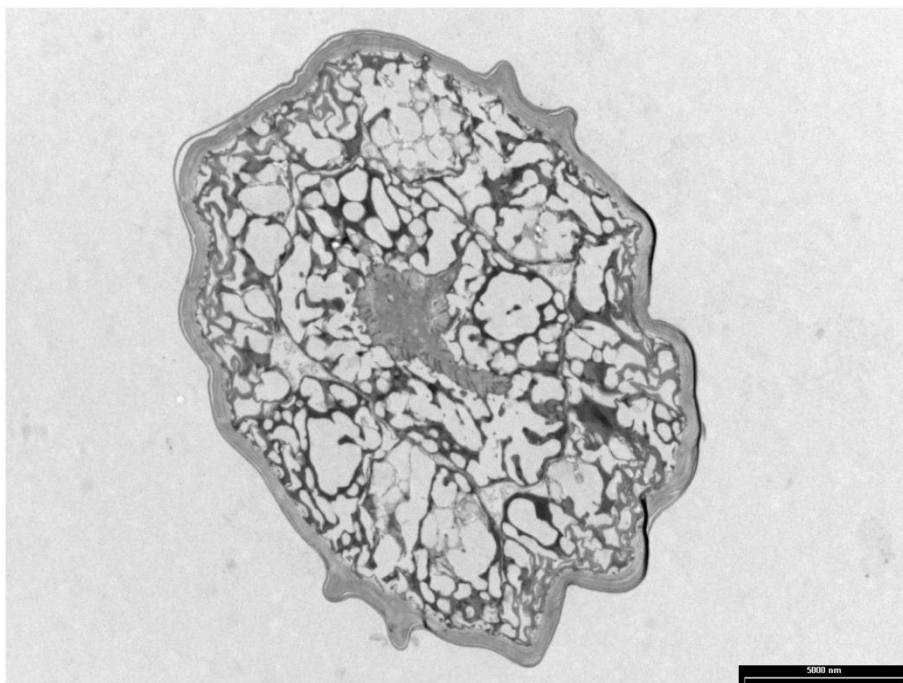

Fig. S4. Enlarged version of Fig. 3f, for legend and labels see Fig. 3.
